# Supplementary material for: Suppression of REV7 enhances cisplatin sensitivity in ovarian clear cell carcinoma cells
Source: PubMed Central journal article supplement — Cancer Sci. 2014 Apr 7;105(5):545–52. doi: 10.1111/cas.12390 (PMC4317831; doi:10.1111/cas.12390), 2014-04-07
Supplement: cas0105-0545-sd3.pdf [file cas0105-0545-sd3.pdf]

**Table S1. Multivariate analysis of several clinicopathologic parameters in relation to survival of advanced stage patients (n=87)**

| Variables (n)                 | OS                     |                 | PFS                    |                 |
|-------------------------------|------------------------|-----------------|------------------------|-----------------|
|                               | Relative risk (95% CI) | <i>P</i> -value | Relative risk (95% CI) | <i>P</i> -value |
| <b><u>Age</u></b>             |                        |                 |                        |                 |
| ≥60 (61) [vs <60 (26)]        | 0.45 (0.207-1.002)     | 0.051           | 0.653 (0.352-1.210)    | 0.175           |
| <b><u>Clear or not</u></b>    |                        |                 |                        |                 |
| clear (23) [vs nonclear (64)] | 1.394 (0.658-2.951)    | 0.385           | 0.699 (0.353-1.384)    | 0.304           |
| <b><u>CA125</u></b>           |                        |                 |                        |                 |
| ≥50 (80) [vs <50 (7)]         | 2.095 (0.478-9.175)    | 0.326           | 2.087 (0.611-7.132)    | 0.24            |
| <b><u>Residual tumor</u></b>  |                        |                 |                        |                 |
| Present (39) [vs Absent (48)] | 2.624 (1.351-5.093)    | 0.004           | 1.331 (0.757-2.343)    | 0.321           |
| <b><u>REV7 expression</u></b> |                        |                 |                        |                 |
| High (48) [vs Low (39)]       | 1.364 (0.715-2.604)    | 0.346           | 2.094 (1.178-3.720)    | 0.012           |

**Table S2. Association between REV7 expression and 1-year progression-free survival in patients with advanced stage EOC received platinum-based chemotherapy (n=82)**

|                 | n  | REV7 low (%) | REV7 high (%) | <i>P</i> -value |
|-----------------|----|--------------|---------------|-----------------|
| progression (+) | 31 | 9 (29.0)     | 22 (71.0)     | } 0.022         |
| progression (-) | 51 | 29(56.9)     | 22 (43.1)     |                 |
